# Supplementary material for: A Lower CD4 Count Predicts Most Causes of Death except Cardiovascular Deaths. The Austrian HIV Cohort Study
Source: MDPI journal article supplement (doi:10.3390/ijerph182312532), 2021-11-28
Supplement: s1 [file s1]

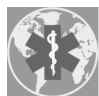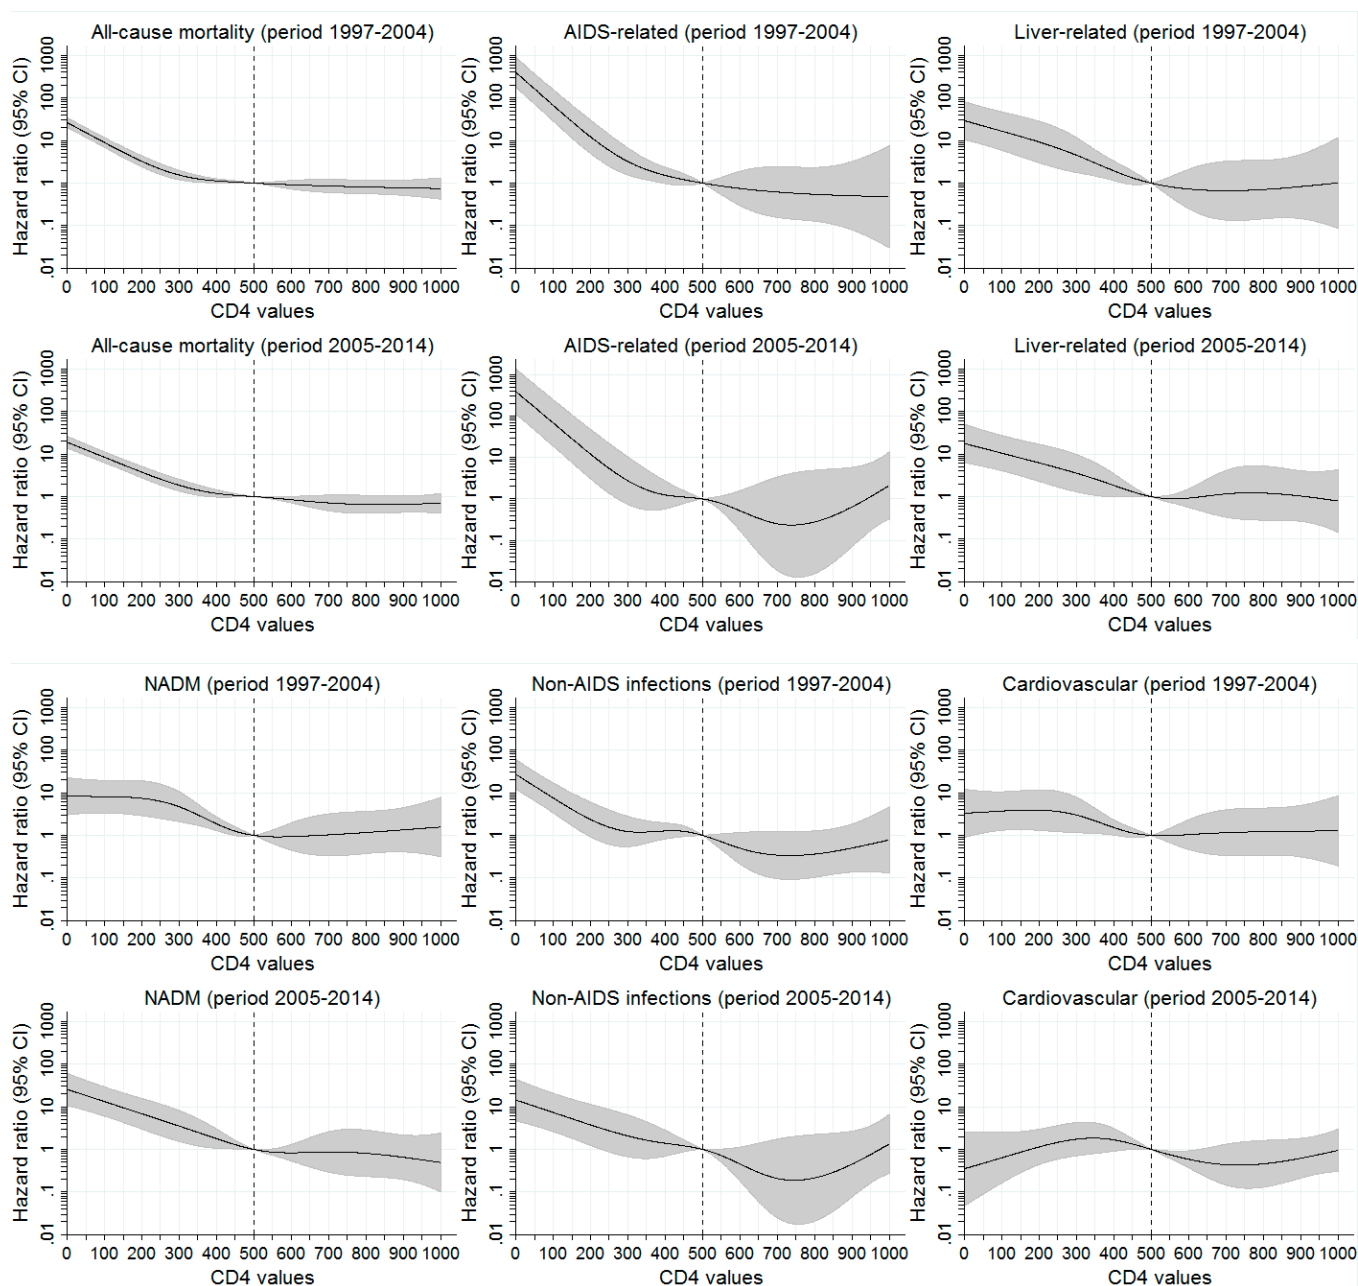

**Figure S1.** Associations of latest CD4 counts with all-cause mortality and specific causes of death regarding two time periods. Results from adjusted Cox regression models.
